# Supplementary material
Source: PubMed Central journal article supplement (PMC7219518)
Supplement: NIHMS1549522-supplement-Supplemental_Material.pdf [file NIHMS1549522-supplement-Supplemental_Material.pdf]

## **SUPPLEMENTAL MATERIAL**

**Supplemental Table 1. List of Variants**

| Gene                                                                   | Variant DNA Sequence Change | Classification                | Number of individuals | Number of families |
|------------------------------------------------------------------------|-----------------------------|-------------------------------|-----------------------|--------------------|
| MYH7<br>(N=77, including 3 subjects with 2 <sup>nd</sup> gene variant) | c.170C>A                    | Likely Pathogenic*            | 1                     | 1                  |
|                                                                        | c.746G>A                    | Pathogenic                    | 3                     | 3                  |
|                                                                        | c.968T>A                    | Likely Pathogenic             | 2                     | 1                  |
|                                                                        | c.1012G>A                   | Likely Pathogenic             | 3                     | 1                  |
|                                                                        | c.1052A>C                   | Likely Pathogenic*            | 1                     | 1                  |
|                                                                        | c.1208G>A                   | Pathogenic                    | 1                     | 1                  |
|                                                                        | c.1477A>G                   | Likely Pathogenic             | 1                     | 1                  |
|                                                                        | c.1491G>T                   | Likely Pathogenic             | 3                     | 2                  |
|                                                                        | c.1505A>G                   | Likely Pathogenic             | 1                     | 1                  |
|                                                                        | c.1727A>G                   | Pathogenic/Likely Pathogenic  | 1                     | 1                  |
|                                                                        | c.1750G>C                   | Pathogenic                    | 1                     | 1                  |
|                                                                        | c.1816G>A                   | Pathogenic                    | 3                     | 2                  |
|                                                                        | c.1954A>G                   | Pathogenic                    | 2                     | 2                  |
|                                                                        | c.1987C>T                   | Pathogenic/ Likely Pathogenic | 3                     | 2                  |
|                                                                        | c.1988G>A                   | Pathogenic                    | 9                     | 7                  |
|                                                                        | c.2104A>G                   | Likely Pathogenic             | 1                     | 1                  |
|                                                                        | c.2146G>A                   | Pathogenic                    | 1                     | 1                  |
|                                                                        | c.2156G>A                   | Pathogenic                    | 5                     | 3                  |
|                                                                        | c.2167C>T                   | Pathogenic                    | 5                     | 1                  |
|                                                                        | c.2191C>T                   | Pathogenic                    | 4                     | 4                  |
|                                                                        | c.2201A>C                   | Pathogenic                    | 1                     | 1                  |
|                                                                        | c.2221G>T                   | Pathogenic                    | 2                     | 1                  |
|                                                                        | c.2334C>G                   | Pathogenic                    | 1                     | 1                  |
| c.2389G>A                                                              | Pathogenic                  | 2                             | 2                     |                    |
| c.2524A>G                                                              | Likely Pathogenic           | 1                             | 1                     |                    |
| c.2544G>C                                                              | Likely Pathogenic*          | 1                             | 1                     |                    |

| Gene                                                                     | Variant DNA Sequence Change     | Classification                | Number of individuals | Number of families |
|--------------------------------------------------------------------------|---------------------------------|-------------------------------|-----------------------|--------------------|
|                                                                          | c.2555T>C                       | Likely Pathogenic             | 1                     | 1                  |
|                                                                          | c.2572C>T                       | Likely Pathogenic             | 2                     | 2                  |
|                                                                          | c.2609G>A                       | Pathogenic                    | 2                     | 1                  |
|                                                                          | c.2681A>G                       | Pathogenic                    | 1                     | 1                  |
|                                                                          | c.2717A>G                       | Pathogenic                    | 1                     | 1                  |
|                                                                          | c.2770G>A                       | Pathogenic                    | 2                     | 2                  |
|                                                                          | c.2788G>A                       | Pathogenic                    | 2                     | 1                  |
|                                                                          | c.2788G>C                       | Pathogenic/Likely Pathogenic  | 1                     | 1                  |
|                                                                          | c.2846A>T                       | Likely Pathogenic*            | 2                     | 2                  |
|                                                                          | c.4135G>A                       | Pathogenic                    | 1                     | 1                  |
|                                                                          | c.4487A>C                       | Likely pathogenic             | 1                     | 1                  |
|                                                                          | c.5135G>A                       | Likely pathogenic             | 2                     | 1                  |
| MYBPC3<br>(N=109, including 1 subject with 2 <sup>nd</sup> gene variant) | c.172delG                       | Pathogenic                    | 2                     | 1                  |
|                                                                          | c.177_187delAGAGGG CACAC        | Pathogenic                    | 2                     | 1                  |
|                                                                          | c.223G>A                        | Likely Pathogenic             | 1                     | 1                  |
|                                                                          | c.436dupA                       | Pathogenic                    | 2                     | 2                  |
|                                                                          | c.459delC                       | Pathogenic                    | 2                     | 1                  |
|                                                                          | c.671_673delTGC                 | Pathogenic                    | 1                     | 1                  |
|                                                                          | c.772G>A                        | Pathogenic                    | 8                     | 7                  |
|                                                                          | c.821+1G>A                      | Pathogenic                    | 3                     | 2                  |
|                                                                          | c.927-2A>G                      | Pathogenic                    | 2                     | 2                  |
|                                                                          | c.927-9G>A                      | Pathogenic                    | 1                     | 1                  |
|                                                                          | c.1090G>C                       | Likely pathogenic*            | 1                     | 1                  |
|                                                                          | c.1153_1168delGTGGA ACTGGCTGACC | Pathogenic/ Likely Pathogenic | 2                     | 1                  |
| c.1210C>T                                                                | Pathogenic                      | 3                             | 3                     |                    |

| Gene | Variant DNA Sequence Change | Classification     | Number of individuals | Number of families |
|------|-----------------------------|--------------------|-----------------------|--------------------|
|      | c.1310delT                  | Pathogenic         | 2                     | 2                  |
|      | c.1484G>A                   | Pathogenic         | 1                     | 1                  |
|      | c.1504C>T                   | Pathogenic         | 4                     | 4                  |
|      | c.1509C>G                   | Likely Pathogenic* | 2                     | 1                  |
|      | c.1591G>C                   | Likely Pathogenic  | 1                     | 1                  |
|      | c.1624G>C                   | Pathogenic         | 2                     | 1                  |
|      | c.1678delG                  | Likely Pathogenic  | 1                     | 1                  |
|      | c.1790G>A                   | Pathogenic         | 1                     | 1                  |
|      | c.1892delT                  | Pathogenic         | 5                     | 1                  |
|      | c.1928-2A>G                 | Pathogenic         | 6                     | 5                  |
|      | c.2048G>A                   | Pathogenic         | 1                     | 1                  |
|      | c.2170C>T                   | Pathogenic         | 1                     | 1                  |
|      | c.2308G>A                   | Pathogenic         | 5                     | 3                  |
|      | c.2373_2374insG             | Pathogenic         | 1                     | 1                  |
|      | c.2374T>C                   | Likely Pathogenic  | 2                     | 2                  |
|      | c.2429G>A                   | Pathogenic         | 1                     | 1                  |
|      | c.2454G>A                   | Pathogenic         | 2                     | 2                  |
|      | c.2490dupT                  | Pathogenic         | 2                     | 2                  |
|      | c.2541C>G                   | Pathogenic         | 2                     | 1                  |
|      | c.2550delC                  | Pathogenic         | 1                     | 1                  |
|      | c.2670G>A                   | Pathogenic         | 4                     | 2                  |
|      | c.2774-2775delAG            | Pathogenic         | 1                     | 1                  |
|      | c.2827C>T                   | Pathogenic         | 1                     | 1                  |
|      | c.2864_2865delCT            | Pathogenic         | 2                     | 2                  |
|      | c.2905+1G>A                 | Pathogenic         | 2                     | 2                  |
|      | c.3079delGinsAA             | Pathogenic         | 1                     | 1                  |
|      | c.3124_3125insAA            | Pathogenic         | 2                     | 1                  |
|      | c.3192_3193insC             | Pathogenic         | 1                     | 1                  |

| Gene                                                                  | Variant DNA Sequence Change | Classification     | Number of individuals | Number of families |
|-----------------------------------------------------------------------|-----------------------------|--------------------|-----------------------|--------------------|
|                                                                       | c.3330+2T>C                 | Pathogenic         | 1                     | 1                  |
|                                                                       | c.3330+2T>G                 | Pathogenic         | 9                     | 7                  |
|                                                                       | c.3330+5G>C                 | Pathogenic         | 1                     | 1                  |
|                                                                       | c.3330+1T>G                 | Likely Pathogenic  | 3                     | 2                  |
|                                                                       | c.3414dupC                  | Pathogenic         | 2                     | 2                  |
|                                                                       | c.3624delC                  | Pathogenic         | 1                     | 1                  |
|                                                                       | c.3662delT                  | Likely Pathogenic  | 1                     | 1                  |
|                                                                       | c.3697C>T                   | Pathogenic         | 2                     | 1                  |
|                                                                       | c.3735delC                  | Likely Pathogenic  | 1                     | 1                  |
| TNNT2<br>(N=9, including 1 subject with 2 <sup>nd</sup> gene variant) | c.236T>A                    | Likely Pathogenic  | 3                     | 2                  |
|                                                                       | c.274C>T                    | Likely Pathogenic* | 1                     | 1                  |
|                                                                       | c.487_489delGAG             | Pathogenic         | 1                     | 1                  |
|                                                                       | c.821+1G>T                  | Likely Pathogenic  | 1                     | 1                  |
|                                                                       | c.832C>T                    | Likely Pathogenic* | 1                     | 1                  |
|                                                                       | c.856C>T                    | Not in ClinVar     | 2                     | 1                  |
| TNNI3<br>(N=7)                                                        | c.431T>C                    | Likely Pathogenic  | 2                     | 1                  |
|                                                                       | c.484C>T                    | Likely Pathogenic  | 2                     | 1                  |
|                                                                       | c.592C>G                    | Likely Pathogenic  | 3                     | 2                  |
| MYL2<br>(N=2)                                                         | c.45_46delCAinsT            | Likely Pathogenic  | 1                     | 1                  |
|                                                                       | c.239C>A                    | Likely Pathogenic  | 1                     | 1                  |
| MYL3<br>(N=5)                                                         | c.170C>A                    | Pathogenic         | 3                     | 2                  |
|                                                                       | c.445A>G                    | Pathogenic         | 2                     | 2                  |
| TPM1<br>(N=5)                                                         | c.457C>G                    | Likely Pathogenic  | 3                     | 1                  |
|                                                                       | c.523G>A                    | Pathogenic         | 1                     | 1                  |
|                                                                       | c.673A>G                    | Likely Pathogenic* | 1                     | 1                  |
| ACTC<br>(N=3)                                                         | c.301G>A                    | Pathogenic         | 2                     | 1                  |
|                                                                       | c.889G>T                    | Pathogenic         | 1                     | 1                  |

\*Variant either not present or reported as of uncertain significance (VUS) in ClinVar but considered likely pathogenic by VANISH review, incorporating private cosegregation data in this cohort and absence from population databases.

**Supplemental table 2. Domains and outcome measures for the primary outcome**

| <b>DOMAIN</b>                                           | <b>COMPONENT OUTCOMES</b>                                                                                                                  |
|---------------------------------------------------------|--------------------------------------------------------------------------------------------------------------------------------------------|
| <b>SERUM BIOMARKERS OF MYOCARDIAL INJURY AND STRESS</b> | High-sensitivity cardiac troponin<br>NT-pro-BNP                                                                                            |
| <b>CARDIAC MORPHOLOGY</b>                               | CMR LV mass<br>CMR LA volume<br>CMR end-diastolic volume<br>CMR end-systolic volume<br>Z-score for echocardiographic max LV wall thickness |
| <b>CARDIAC FUNCTION</b>                                 | Z-score for echocardiographic E'<br>Z-score for echocardiographic S'                                                                       |

CMR; cardiovascular magnetic resonance imaging; LA, left atrial; LV, left ventricular; NT-pro-BNP, N-terminal of the pro brain natriuretic peptide.

**Supplemental table 3. Demographics across regions**

|                                                    | US         | Canada     | Brazil     | Denmark    | P value* |
|----------------------------------------------------|------------|------------|------------|------------|----------|
| <b>N (%)</b>                                       | 169 (80)   | 4 (2)      | 27 (13)    | 12 (6)     |          |
| <b>Primary cohort (%)</b>                          | 137 (81)   | 4 (100)    | 27 (100)   | 10 (83)    |          |
| <b>Age (yr)</b>                                    | 20.2 (8.8) | 14.0 (0.8) | 33.6 (8.2) | 27.6 (7.8) | <0.001   |
| <b>Female gender (%)</b>                           | 73 (43)    | 1 (25)     | 7 (26)     | 5 (42)     | 0.276    |
| <b>Race (%)</b>                                    |            |            |            |            | <0.001   |
| White                                              | 162 (96)   | 4 (100)    | 25 (93)    | 12 (100)   |          |
| Black                                              | 1 (1)      | 0 (0)      | 2 (7)      | 0 (0)      |          |
| Other                                              | 6 (3)      | 0 (0)      | 0 (0)      | 0 (0)      |          |
| <b>NYHA class (%)</b>                              |            |            |            |            |          |
| I                                                  | 164 (97)   | 3 (75)     | 19 (70)    | 12 (100)   | 0.282    |
| II                                                 | 5 (3)      | 1 (25)     | 8 (30)     | 0 (0)      |          |
| <b>Pathogenic or likely pathogenic variant (%)</b> |            |            |            |            | 0.391    |
| ACTC                                               | 2 (1)      | 0 (0)      | 0 (0)      | 1 (8)      |          |
| MYBPC3                                             | 89 (53)    | 1 (25)     | 11 (41)    | 7 (58)     |          |
| MYH7                                               | 53 (31)    | 3 (75)     | 15 (56)    | 3 (25)     |          |
| MYL2                                               | 2 (1)      | 0 (0)      | 0 (0)      | 0 (0)      |          |
| MYL3                                               | 4 (2)      | 0 (0)      | 1 (4)      | 0 (0)      |          |
| TNNI3                                              | 7 (4)      | 0 (0)      | 0 (0)      | 0 (0)      |          |
| TNNT2                                              | 8 (5)      | 0 (0)      | 0 (0)      | 0 (0)      |          |
| TPM1                                               | 4 (2)      | 0 (0)      | 0 (0)      | 1 (8)      |          |

\*: Overall comparison across regions comparing North America (US and Canada due to small sample size in Canada), Brazil and Denmark. Chi-square or Fisher's Exact test for gender, race, NYHA class and genes. ANOVA for Age.
